# Supplementary material for: The nexus between forest fragmentation in Africa and Ebola virus disease outbreaks
Source: PubMed Central journal article supplement (PMC5307336; doi:10.1038/srep41613), 2017-02-14
Supplement: srep41613-s1.pdf [file srep41613-s1.pdf]

1  
2  
3 **The nexus between forest fragmentation in Africa and Ebola virus**  
4 **disease outbreaks**

5 *Maria Cristina Rulli<sup>1</sup>, Monia Santini<sup>2</sup>, David T S Hayman<sup>3</sup>, Paolo D'Odorico<sup>4,5</sup>*

6  
7 <sup>1</sup>Department of Civil and Environmental Engineering, Politecnico di Milano, Milan,  
8 Italy.

9 <sup>2</sup>Division on Impacts on Agriculture, Forests and Ecosystem Services, Fondazione  
10 Centro Euro-Mediterraneo sui Cambiamenti Climatici Foundation, Viterbo, Italy.

11 <sup>3</sup>Molecular Epidemiology and Public Health Laboratory (*m*EpiLab), Hopkirk  
12 Research Institute, Massey University, Private Bag 11 222, Palmerston North 4442,  
13 New Zealand

14 <sup>4</sup>Department of Environmental Sciences, University of Virginia, Charlottesville, VA,  
15 USA.

16 <sup>5</sup>National Social Environmental Synthesis Center, University of Maryland,  
17 Annapolis, MD, USA.

18  
19 \*Correspondence to [cristina.rulli@polimi.it](mailto:cristina.rulli@polimi.it)

20  
21  
22  
23 **Supplementary materials**  
24  
25

26

27

## Figures (Supplementary materials)

28

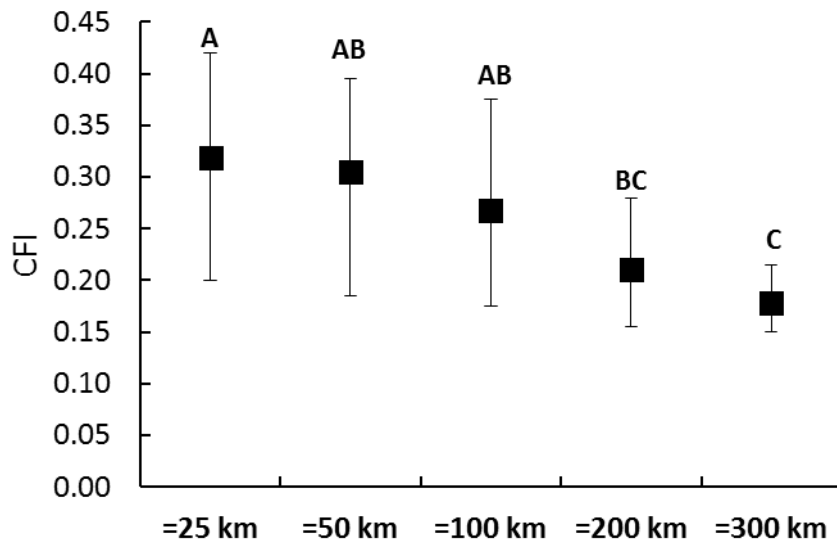

29

30

31

32

33

**Fig. S1. Average forest fragmentation as a function of the distance.** Average forest fragmentation as a function of the distance from the eleven first infection centers (Table S1). Error bars indicate the 25% and 75% percentiles. Different capital letters indicate statistically different means ( $\alpha=0.05$ ).

34

35

36

37

38

39

40

41  
42  
43  
44  
45  
46  
47  
48  
49  
50  
51

**Fig. S2. Maps of hot spots of fragmentation** Maps of hot spots of fragmentation for  
a) Central Africa (composite between 2000 and 2014) and b) West Africa  
(2014) with superimposed outbreaks. Background as in Figure 1. Maps  
generated by the authors using ARCGIS 10.2-Version 10.2.0.338, licensed to  
Politecnico di Milano. The license term can be found on the following link:  
<http://www.esri.com/legal/software-license>

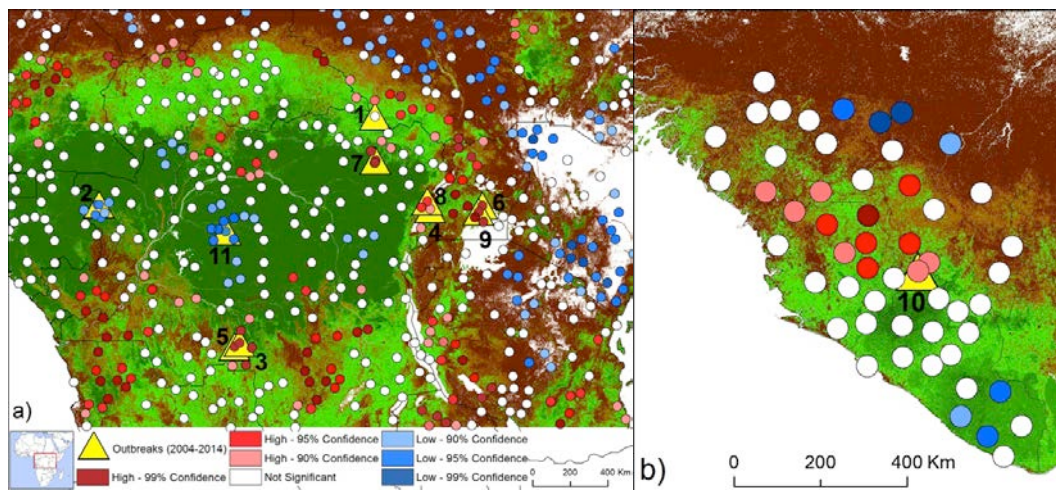

52  
53  
54

55  
56  
57  
58  
59  
60  
61  
62  
63  
64  
65  
66  
67  
68  
69

## Tables (Supplementary materials)

**Table S1. Average forest cover as a function of the distance from centers of first infection.** Forest cover is calculated using circles of radius  $r$  centered on the infection location, using for each location forest data from the corresponding infection year. The p-values reported in boldface indicate that within a 25 or 50 km distance from the first infection areas the average forest cover is statistically different ( $\alpha=0.05$ ) from the regional mean of  $[0.55\div 0.61]$ . The regional mean was calculated for the year 2014 by sampling forest cover in 2287 circles with 25 km, 50 km, 100 km, 200 km, and 300 km radii randomly scattered across the region. The p-values (IQR) demonstrate that the first infection areas have a forest cover significantly greater (for distances,  $r$ , up to 300 km) than the average forest cover of  $[0.43\div 0.50]$  in randomly selected areas with population density within the interquartile range (IQR) of the population in first infection areas.

| N. | Infection Center | Forest cover within a distance, $r$ , from the center of Infection |               |               |               |               |
|----|------------------|--------------------------------------------------------------------|---------------|---------------|---------------|---------------|
|    |                  | $r=25$ km                                                          | $r=50$ km     | $r=100$ km    | $r=200$ km    | $r=300$ km    |
| 1  | Yambio           | 0.99                                                               | 0.99          | 0.98          | 0.92          | 0.82          |
| 2  | Odzala           | 0.99                                                               | 0.99          | 0.93          | 0.87          | 0.86          |
| 3  | Mombo Mounene    | 0.91                                                               | 0.83          | 0.77          | 0.78          | 0.77          |
| 4  | Kabango          | 0.78                                                               | 0.76          | 0.71          | 0.70          | 0.67          |
| 5  | Luebo            | 0.88                                                               | 0.81          | 0.76          | 0.77          | 0.76          |
| 6  | Nakisamata       | 0.85                                                               | 0.73          | 0.47          | 0.31          | 0.26          |
| 7  | Isiro            | 0.91                                                               | 0.93          | 0.95          | 0.97          | 0.96          |
| 8  | Nyanswiga        | 0.81                                                               | 0.75          | 0.68          | 0.65          | 0.62          |
| 9  | Luwero District  | 0.83                                                               | 0.75          | 0.49          | 0.32          | 0.27          |
| 10 | Meliandou        | 0.58                                                               | 0.75          | 0.81          | 0.75          | 0.62          |
| 11 | Inkanamongo      | 0.99                                                               | 0.99          | 0.99          | 0.99          | 0.97          |
|    | Average          | 0.87                                                               | 0.84          | 0.78          | 0.73          | 0.69          |
|    | p-value          | <b>0.0052</b>                                                      | <b>0.0301</b> | 0.1532        | 0.3548        | 0.2670        |
|    | p-value (IQR)    | <b>0.0001</b>                                                      | <b>0.0001</b> | <b>0.0247</b> | <b>0.0041</b> | <b>0.0066</b> |

70  
71  
72  
73

74  
75  
76  
77  
78  
79  
80  
81  
82  
83  
84  
85  
86  
87  
88

**Table S2. Average forest loss (%) as a function of the distance from centers of first infection.** Forest loss is calculated as the difference in forest cover between 2000 and infection year, using circles of radius  $r$  centered on the infection location. The p-values indicate that the average forest loss in first infection areas is not statistically different ( $\alpha=0.05$ ) from the regional mean forest loss between 2000 and 2014 calculated by sampling forest cover in 2287 circles with 25 km, 50 km, 100 km, 200 km, and 300 km radii randomly scattered across the region (mean forest loss = [5.48%÷3.13%]). Similar results (p-value (IQR)) are obtained by sampling a sub-set of random circles (mean forest loss = [7.66%÷4.14%]) that have population density within the interquartile range (IQR) of the population density in the areas of first infection.

| <b>Forest loss (%) between 2000 and infection date within a distance, r</b> |                         |                |                |                 |                 |                 |
|-----------------------------------------------------------------------------|-------------------------|----------------|----------------|-----------------|-----------------|-----------------|
| <b>N.</b>                                                                   | <b>Infection Center</b> | <b>R=25 km</b> | <b>R=50 km</b> | <b>R=100 km</b> | <b>R=200 km</b> | <b>R=300 km</b> |
| 1                                                                           | Yambio                  | 0.27%          | 0.15%          | 0.16%           | 0.25%           | 0.44%           |
| 2                                                                           | Odzala                  | 0.44%          | 0.30%          | 0.29%           | 0.25%           | 0.26%           |
| 3                                                                           | Mombo Mounene           | 4.43%          | 4.50%          | 4.31%           | 3.43%           | 2.56%           |
| 4                                                                           | Kabango                 | 1.97%          | 1.95%          | 3.32%           | 2.70%           | 2.03%           |
| 5                                                                           | Luebo                   | 8.08%          | 7.03%          | 5.84%           | 4.13%           | 3.00%           |
| 6                                                                           | Nakisamata              | 1.79%          | 3.17%          | 4.43%           | 5.09%           | 4.77%           |
| 7                                                                           | Isiro                   | 7.81%          | 6.34%          | 4.36%           | 2.40%           | 2.07%           |
| 8                                                                           | Nyanswiga               | 1.86%          | 2.78%          | 4.65%           | 4.92%           | 3.46%           |
| 9                                                                           | Luwero District         | 2.34%          | 3.52%          | 4.42%           | 5.26%           | 4.51%           |
| 10                                                                          | Meliandou               | 1.74%          | 2.35%          | 3.21%           | 3.16%           | 3.85%           |
| 11                                                                          | Inkanamongo             | 1.38%          | 1.68%          | 1.60%           | 1.96%           | 2.27%           |
|                                                                             | Average                 | 2.92%          | 3.07%          | 3.33%           | 3.05%           | 2.66%           |
|                                                                             | p-value                 | 0.9566         | 0.7704         | 0.4666          | 0.8250          | 0.6401          |
|                                                                             | p-value (IQR)           | 0.0501         | 0.0565         | 0.6255          | 0.1959          | 0.0507          |

89  
90

91  
92  
93  
94  
95  
96  
97  
98  
99  
100  
101  
102  
103  
104  
105  
106

**Table S3. Average fragmentation as a function of the distance from centers of first infection.** Fragmentation is expressed by the CFI index (see Methods) and calculated using circles of radius  $r$  centered on the first infection location. Average values reported in boldface indicate that they are statistically different (p-value < 0.05) from the mean regional CFI value of  $[0.17 \div 0.15]$ , calculated by randomly sampling CFI in 2287 circles with 25 km, 50 km, 100 km, 200 km, and 300 km radii randomly scattered across the region. The average CFI in the surroundings of areas ( $r \leq 100\text{km}$ ) of first infection is still significantly different (p-value (IQR) < 0.05) from the regional mean CFI =  $[0.20 \div 0.16]$  calculated considering the sub-sample of random circles having population density within the interquartile range (IQR) of that of the first infection areas. The statistical analysis of fragmentation hotspots for the first infection locations is based on the Getis-Ord method (59) and the results are reported in the last column with significance levels of 0.90 (\*), 0.95 (\*\*), and 0.99 (\*\*\*).

| N. | Infection Center | Average CFI within a distance, $r$ , from infection center |               |               |               |               | Fragmentation Hotspot? |
|----|------------------|------------------------------------------------------------|---------------|---------------|---------------|---------------|------------------------|
|    |                  | $r=25$<br>km                                               | $r=50$<br>km  | $r=100$<br>km | $r=200$<br>km | $r=300$<br>km |                        |
| 1  | Yambio           | 0.07                                                       | 0.06          | 0.09          | 0.16          | 0.17          | Yes                    |
| 2  | Odzala           | 0.03                                                       | 0.03          | 0.06          | 0.07          | 0.07          | No                     |
| 3  | Mombo Mounene    | 0.31                                                       | 0.37          | 0.32          | 0.29          | 0.25          | Yes***                 |
| 4  | Kabango          | 0.31                                                       | 0.29          | 0.32          | 0.27          | 0.20          | Yes**                  |
| 5  | Luebo            | 0.37                                                       | 0.41          | 0.37          | 0.30          | 0.25          | Yes***                 |
| 6  | Nakisamata       | 0.58                                                       | 0.53          | 0.36          | 0.22          | 0.18          | Yes***                 |
| 7  | Isiro            | 0.46                                                       | 0.38          | 0.27          | 0.15          | 0.13          | Yes**                  |
| 8  | Nyanswiga        | 0.38                                                       | 0.38          | 0.38          | 0.31          | 0.23          | Yes*                   |
| 9  | Luwero District  | 0.62                                                       | 0.53          | 0.38          | 0.23          | 0.19          | Yes***                 |
| 10 | Meliandou        | 0.31                                                       | 0.28          | 0.26          | 0.24          | 0.20          | Yes*                   |
| 11 | Inkanamongo      | 0.09                                                       | 0.09          | 0.08          | 0.08          | 0.09          | No                     |
|    | Mean             | <b>0.32</b>                                                | <b>0.30</b>   | <b>0.26</b>   | 0.21          | 0.18          |                        |
|    | p-value          | <b>0.0062</b>                                              | <b>0.0047</b> | <b>0.0072</b> | 0.0562        | 0.5252        |                        |
|    | p-value (IQR)    | <b>0.0318</b>                                              | <b>0.0451</b> | <b>0.0347</b> | 0.1565        | 0.9423        |                        |

107  
108

109 **Table S4. Average change in fragmentation (%) as a function of the distance**  
110 **from centers of first infection.** Change in fragmentation is calculated using circles  
111 of radius  $r$  centered on the infection location. Average changes in CFI in the first  
112 infection points (within a distance  $r \leq 25$  km) is significantly different from the  
113 regional mean of 296% calculated between 2000 and 2014 in 2287 circles of 25 km  
114 radius randomly scattered across the region.  
115 The p-values (IQR) reported in boldface indicate that changes in CFI are  
116 significantly (p-value (IQR) < 0.05) higher (for distances,  $r$ , up to 100 km) than the  
117 mean regional value ([142÷70]) calculated in circular areas of radius  $r$  (25 km, 50  
118 km, 100 km, 200 km, and 300 km) randomly scattered across the region with the  
119 condition that in every circle the population density is comprised within the  
120 interquartile range (IQR) of the population density in the surroundings (distance  $\leq r$ )  
121 of the centers of first infection.  
122

| N. |                  | Change in CFI (%) between 2000 and infection date within a distance, $r$ |               |               |                |            |
|----|------------------|--------------------------------------------------------------------------|---------------|---------------|----------------|------------|
|    | Infection Center | $r=25$ km                                                                | $r=50$ km     | $r=100$ km    | $r=200$ km     | $r=300$ km |
| 1  | Yambio           | 114                                                                      | 60            | 27            | 13             | 14         |
| 2  | Odzala           | 579                                                                      | 151           | 41            | 26             | 38         |
| 3  | Mombo Mounene    | 174                                                                      | 122           | 110           | 98             | 73         |
| 4  | Kabango          | 45                                                                       | 48            | 62            | 48             | 45         |
| 5  | Luebo            | 222                                                                      | 145           | 124           | 102            | 74         |
| 6  | Nakisamata       | 28                                                                       | 33            | 25            | 27             | 21         |
| 7  | Isiro            | 2111                                                                     | 1637          | 875           | 397            | 265        |
| 8  | Nyanswiga        | 43                                                                       | 41            | 56            | 62             | 52         |
| 9  | Luwero District  | 30                                                                       | 37            | 25            | 28             | 21         |
| 10 | Meliandou        | 7                                                                        | 22            | 38            | 34             | 35         |
| 11 | Inkanamongo      | 370                                                                      | 299           | 277           | 289            | 190        |
|    | Average          | 338                                                                      | 236           | 151           | 102            | 75         |
|    | p-value          | <b>0.0258</b>                                                            | 0.0911        | 0.1414        | 0.4825         | 0.3907     |
|    | p-value (IQR)    | <b>0.0033</b>                                                            | <b>0.0258</b> | <b>0.0446</b> | <b>0.04537</b> | 0.9446     |

123

124

125 **Table S5. Change (%) in the mean distance between fragmentation sites.** Change  
 126 (%) in the mean distance between fragmentation sites (i.e., patch, edge,  
 127 perforated, and smaller forest cores, see Figure S2 and Methods) to the  
 128 nearest settlement using circles of different search radius (25, 50, 100 km)  
 129 around the outbreak centers. Increasing and decreasing distance trends are  
 130 found with 90% (\*), and 99% (\*\*) confidence.

| Circle Radius          | Change in distance (%) |       |        |
|------------------------|------------------------|-------|--------|
|                        | 25 km                  | 50 km | 100 km |
| Patch                  | 6**                    | 4**   | 4**    |
| Edge                   | 7**                    | 5**   | 5**    |
| Perforated             | 14**                   | 7**   | 5**    |
| Core < 100 ha          | 18**                   | 6**   | 7**    |
| 100 ha ≤ Core ≤ 200 ha | 26**                   | 13*   | -1     |
| Core > 200 ha          | 15**                   | 13**  | 15     |

132  
 133  
 134  
 135
